# Supplementary material
Source: PubMed Central journal article supplement (PMC4639419)

**Data Supplement 1.** Scatterplot of GFAP levels measured within six hours of injury in children and youth with head trauma (full range of values).

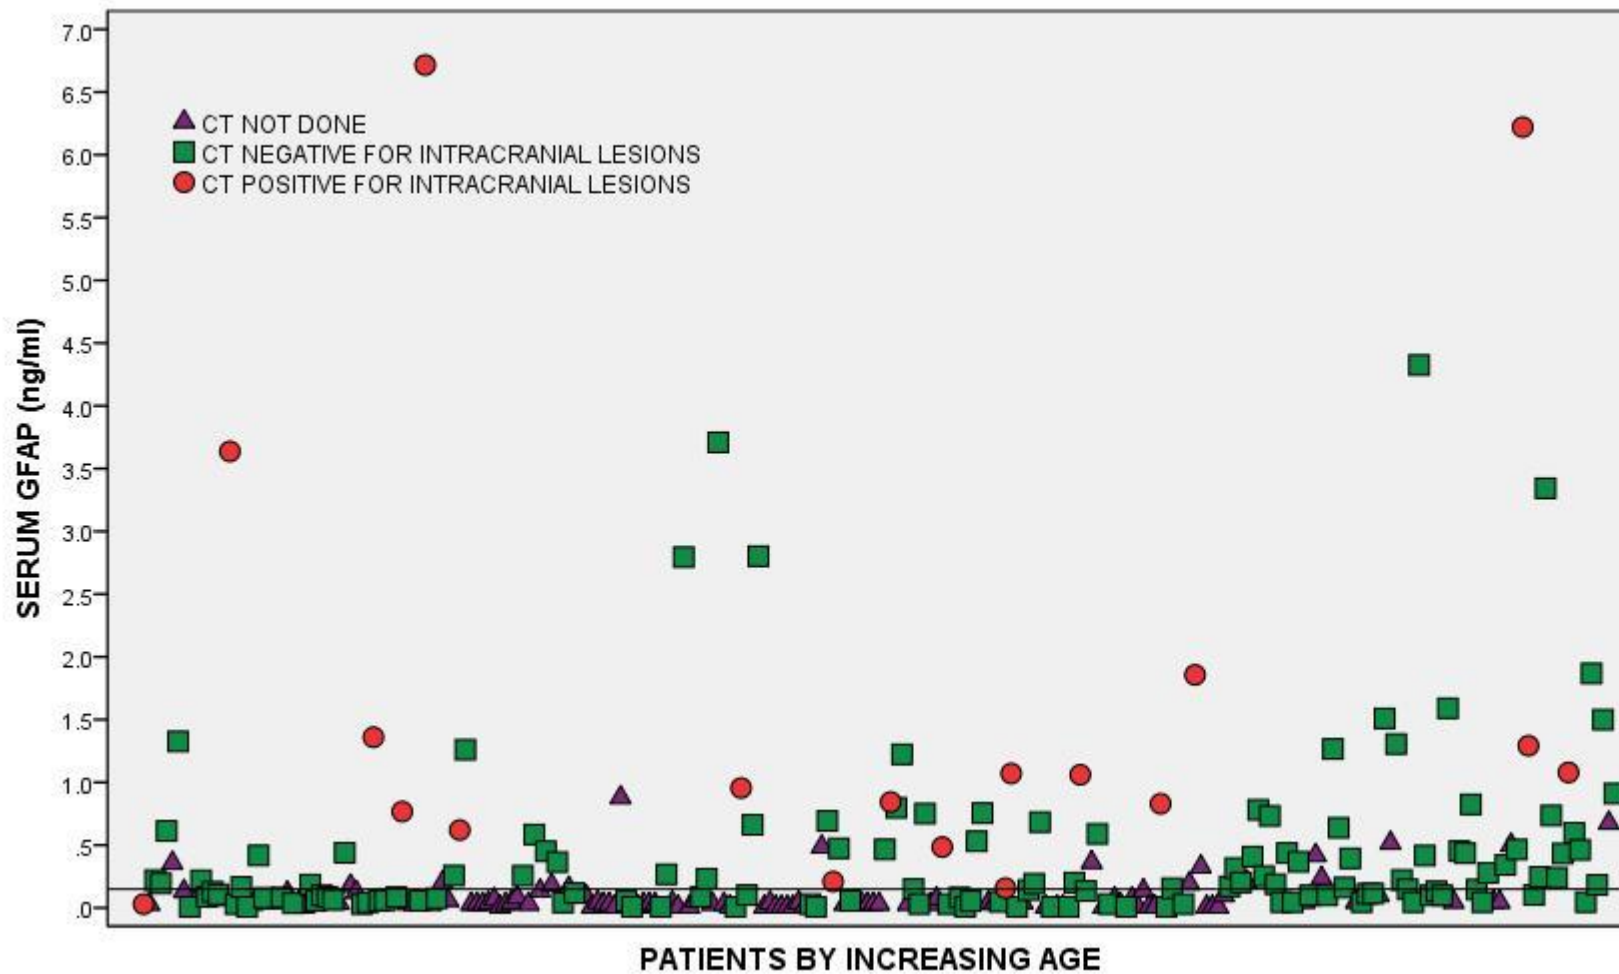

Supplement: NIHMS720498-supplement-Supp_DataS1.pdf [file NIHMS720498-supplement-Supp_DataS1.pdf]
